# Supplementary material for: A novel olfactory receptor gene family in teleost fish
Source: HighWire-hosted journal article supplement (doi:10.1101/gr.6553207), 2007-08-23
Supplement: Supl1.Table2.pdf [file Supl1.Table2.pdf]

**Supplementary Table 2 - ORA genes amino acid Identity (%) and Similarity matrix (%)**

|                |        |      | Identity (%) |      |      |      |      |      |        |      |      |      |      |        |      |      |      |      |        |      |      |      |      |      |        |      |      |      |      |      |
|----------------|--------|------|--------------|------|------|------|------|------|--------|------|------|------|------|--------|------|------|------|------|--------|------|------|------|------|------|--------|------|------|------|------|------|
|                |        |      | Dr ORA       |      |      |      |      |      | Tn ORA |      |      |      |      | Tr ORA |      |      |      |      | OI ORA |      |      |      |      |      | Ga ORA |      |      |      |      |      |
|                |        |      | 1            | 2    | 3    | 4    | 5    | 6    | 2      | 3    | 4    | 5    | 6    | 2      | 3    | 4    | 5    | 6    | 1      | 2    | 3    | 4    | 5    | 6    | 1      | 2    | 3    | 4    | 5    | 6    |
| Similarity (%) | Dr_ORA | 1    |              | 32.9 | 21.3 | 25.1 | 19.4 | 18.8 | 33.9   | 22.3 | 23.9 | 17.4 | 15.4 | 33.0   | 20.2 | 24.1 | 19.3 | 15.5 | 72.8   | 31.4 | 19.1 | 24.4 | 17.7 | 18.9 | 65.9   | 36.4 | 18.2 | 19.9 | 10.9 | 21.3 |
|                |        | 2    | 53.6         |      | 24.7 | 23.3 | 23.8 | 22.3 | 48.3   | 25.2 | 24.1 | 18.1 | 18.4 | 52.1   | 23.9 | 22.8 | 18.1 | 17.9 | 32.6   | 53.5 | 23.1 | 20.8 | 20.7 | 18.1 | 33.1   | 53.5 | 20.3 | 20.3 | 19.3 | 20.3 |
|                |        | 3    | 35.6         | 42.4 |      | 34.9 | 19.9 | 18.8 | 23.4   | 55.2 | 37.6 | 20.2 | 19.5 | 23.7   | 56.9 | 36.6 | 20.1 | 18.3 | 21.2   | 22.0 | 51.8 | 34.3 | 20.1 | 18.6 | 22.1   | 25.0 | 49.3 | 31.2 | 18.3 | 21.1 |
|                |        | 4    | 37.9         | 37.2 | 51.1 |      | 20.0 | 21.3 | 21.8   | 29.5 | 68.8 | 15.8 | 16.5 | 23.4   | 31.6 | 68.0 | 17.3 | 17.3 | 23.9   | 22.0 | 31.3 | 63.1 | 17.6 | 18.4 | 23.2   | 26.6 | 30.6 | 62.3 | 16.5 | 23.1 |
|                |        | 5    | 34.1         | 40.5 | 39.6 | 35.0 |      | 26.3 | 21.5   | 20.8 | 19.7 | 45.3 | 25.3 | 23.9   | 21.0 | 21.0 | 44.9 | 23.4 | 21.7   | 24.8 | 17.4 | 19.5 | 43.2 | 21.2 | 17.7   | 22.4 | 16.2 | 18.0 | 42.4 | 24.0 |
|                |        | 6    | 32.6         | 37.8 | 36.8 | 36.7 | 43.7 |      | 20.5   | 19.0 | 19.3 | 21.3 | 35.6 | 19.2   | 17.1 | 19.9 | 23.0 | 39.7 | 19.6   | 21.7 | 18.5 | 20.3 | 21.8 | 40.0 | 20.1   | 20.6 | 16.2 | 19.5 | 21.4 | 41.7 |
|                | Tn_ORA | 2    | 53.3         | 70.0 | 42.2 | 39.7 | 38.0 | 38.5 |        | 24.4 | 21.4 | 17.1 | 21.4 | 78.5   | 22.8 | 20.9 | 18.5 | 19.6 | 36.8   | 54.1 | 22.0 | 19.1 | 16.2 | 20.0 | 35.1   | 67.6 | 20.9 | 18.8 | 14.9 | 22.0 |
|                |        | 3    | 34.6         | 42.0 | 69.0 | 47.0 | 36.3 | 40.1 | 41.9   |      | 30.7 | 17.7 | 16.2 | 22.7   | 74.4 | 31.6 | 17.6 | 17.3 | 20.5   | 23.1 | 53.9 | 29.9 | 17.0 | 18.6 | 19.0   | 24.7 | 59.8 | 25.3 | 16.3 | 17.5 |
|                |        | 4    | 37.1         | 40.1 | 53.0 | 76.7 | 32.6 | 37.2 | 38.6   | 46.1 |      | 15.9 | 14.6 | 23.2   | 32.7 | 87.1 | 18.1 | 17.4 | 23.4   | 22.4 | 31.8 | 69.0 | 18.1 | 16.1 | 22.5   | 25.8 | 28.2 | 66.4 | 16.4 | 22.9 |
|                |        | 5    | 30.7         | 36.0 | 36.1 | 31.2 | 60.6 | 38.6 | 32.1   | 32.3 | 31.8 |      | 15.9 | 16.5   | 18.5 | 16.7 | 81.0 | 19.2 | 16.6   | 19.7 | 16.2 | 16.7 | 56.6 | 20.8 | 17.2   | 20.1 | 15.4 | 14.4 | 65.4 | 21.1 |
|                |        | 6    | 28.4         | 34.5 | 36.3 | 28.5 | 40.9 | 51.1 | 37.5   | 29.1 | 28.3 | 34.5 |      | 19.1   | 17.4 | 14.5 | 18.4 | 66.9 | 16.6   | 19.6 | 18.0 | 14.7 | 18.3 | 40.1 | 15.6   | 19.6 | 16.6 | 14.3 | 18.4 | 45.2 |
|                | Tr_ORA | 2    | 53.8         | 74.0 | 43.9 | 38.2 | 40.2 | 37.3 | 86.0   | 41.4 | 40.9 | 32.5 | 33.6 |        | 23.0 | 22.4 | 18.6 | 20.7 | 37.7   | 60.7 | 21.4 | 18.8 | 17.9 | 18.1 | 34.8   | 70.5 | 21.2 | 19.4 | 17.4 | 19.6 |
|                |        | 3    | 33.0         | 40.9 | 73.7 | 48.0 | 36.3 | 36.7 | 39.8   | 80.1 | 48.3 | 33.7 | 33.8 | 43.2   |      | 32.1 | 18.8 | 17.8 | 19.8   | 21.9 | 57.8 | 30.9 | 17.7 | 19.4 | 18.4   | 23.4 | 62.2 | 29.1 | 18.4 | 19.7 |
|                |        | 4    | 37.7         | 37.3 | 51.9 | 76.7 | 38.3 | 37.7 | 37.8   | 47.0 | 90.8 | 33.8 | 27.7 | 37.5   | 48.3 |      | 18.3 | 16.7 | 24.1   | 20.2 | 31.1 | 70.7 | 18.1 | 17.3 | 23.9   | 25.4 | 29.3 | 68.5 | 16.6 | 22.1 |
|                |        | 5    | 32.8         | 35.1 | 37.5 | 32.1 | 62.7 | 38.9 | 32.9   | 32.1 | 34.2 | 89.7 | 33.7 | 35.0   | 33.9 | 34.9 |      | 20.4 | 17.4   | 22.6 | 15.8 | 18.8 | 56.0 | 22.1 | 17.9   | 21.1 | 14.5 | 16.0 | 64.6 | 21.3 |
|                |        | 6    | 35.1         | 38.7 | 36.9 | 31.4 | 41.9 | 59.3 | 38.9   | 34.6 | 31.8 | 35.6 | 73.5 | 38.8   | 37.2 | 30.4 | 35.9 |      | 18.0   | 20.0 | 18.7 | 18.2 | 21.0 | 46.4 | 17.2   | 19.9 | 18.1 | 15.6 | 19.6 | 52.0 |
|                | OI_ORA | 1    | 83.5         | 56.3 | 35.0 | 40.9 | 37.4 | 35.3 | 56.1   | 34.3 | 39.6 | 32.5 | 29.1 | 57.1   | 33.5 | 42.4 | 33.3 | 35.5 |        | 33.2 | 18.9 | 25.0 | 18.7 | 19.4 | 77.1   | 38.9 | 17.2 | 19.1 | 19.0 | 21.4 |
|                |        | 2    | 52.9         | 72.4 | 41.6 | 38.0 | 40.7 | 38.1 | 70.4   | 39.8 | 41.3 | 36.1 | 33.8 | 77.0   | 40.6 | 37.0 | 37.8 | 36.1 | 52.8   |      | 22.2 | 21.2 | 19.5 | 19.5 | 32.7   | 63.9 | 18.3 | 17.4 | 17.9 | 21.1 |
|                |        | 3    | 36.6         | 41.7 | 66.1 | 47.4 | 34.3 | 35.6 | 41.3   | 65.3 | 48.4 | 31.5 | 33.2 | 38.7   | 71.7 | 47.7 | 32.3 | 37.6 | 34.1   | 41.0 |      | 29.3 | 18.7 | 18.1 | 17.8   | 23.6 | 51.6 | 25.2 | 16.4 | 20.3 |
|                |        | 4    | 39.1         | 34.2 | 49.4 | 72.4 | 33.9 | 35.4 | 36.2   | 43.8 | 79.9 | 32.1 | 27.1 | 33.4   | 44.9 | 81.2 | 33.4 | 31.0 | 40.4   | 37.9 | 45.8 |      | 19.0 | 16.8 | 22.6   | 23.5 | 27.7 | 68.5 | 16.2 | 20.3 |
|                |        | 5    | 33.2         | 34.9 | 36.8 | 34.5 | 57.9 | 37.3 | 31.7   | 32.2 | 34.5 | 69.3 | 32.6 | 35.3   | 32.9 | 34.8 | 68.4 | 35.4 | 33.3   | 35.2 | 32.0 | 34.1 |      | 21.5 | 16.5   | 17.7 | 16.2 | 16.9 | 57.6 | 20.1 |
|                |        | 6    | 35.3         | 31.8 | 35.3 | 32.1 | 42.4 | 59.7 | 36.2   | 35.7 | 30.9 | 34.3 | 53.1 | 35.4   | 37.1 | 29.2 | 35.4 | 60.5 | 37.7   | 37.1 | 33.0 | 30.6 | 34.8 |      | 17.6   | 16.6 | 16.4 | 16.4 | 20.6 | 50.9 |
|                | Ga_ORA | 1    | 76.3         | 52.1 | 35.4 | 36.9 | 32.3 | 34.7 | 53.9   | 32.1 | 35.6 | 30.6 | 27.0 | 54.2   | 31.0 | 39.4 | 33.0 | 32.9 | 83.1   | 53.5 | 34.9 | 36.7 | 27.3 | 34.7 |        | 37.3 | 20.2 | 18.7 | 16.5 | 18.9 |
|                |        | 2    | 58.3         | 73.1 | 42.5 | 39.5 | 38.4 | 38.9 | 77.5   | 39.5 | 40.5 | 33.9 | 33.4 | 79.7   | 39.2 | 38.8 | 34.0 | 38.0 | 59.5   | 74.8 | 40.3 | 38.1 | 33.3 | 33.0 | 59.2   |      | 21.5 | 22.5 | 19.0 | 22.9 |
| 3              |        | 33.4 | 32.7         | 63.7 | 45.1 | 32.7 | 33.4 | 37.9 | 72.4   | 44.6 | 31.0 | 32.5 | 39.0 | 70.0   | 44.6 | 30.0 | 35.7 | 36.1 | 36.8   | 62.8 | 42.2 | 32.2 | 32.0 | 37.6 | 37.5   |      | 27.3 | 14.8 | 17.3 |      |
| 4              |        | 32.0 | 32.7         | 47.0 | 71.1 | 34.4 | 33.2 | 35.4 | 39.6   | 74.1 | 28.2 | 24.9 | 33.2 | 43.0   | 76.5 | 29.7 | 27.6 | 34.2 | 31.4   | 39.8 | 78.9 | 31.2 | 28.9 | 30.3 | 35.6   | 41.4 |      | 16.1 | 20.0 |      |
| 5              |        | 18.1 | 36.4         | 35.7 | 30.2 | 58.2 | 37.2 | 28.8 | 28.4   | 30.2 | 76.0 | 33.3 | 31.2 | 32.3   | 30.8 | 75.8 | 33.9 | 30.8 | 34.0   | 30.7 | 29.8 | 70.0 | 34.6 | 31.0 | 33.9   | 30.0 | 27.9 |      | 20.2 |      |
| 6              |        | 35.4 | 40.0         | 37.5 | 34.5 | 42.6 | 58.0 | 38.5 | 37.0   | 35.5 | 36.3 | 55.7 | 36.7 | 39.1   | 34.8 | 35.2 | 63.4 | 37.3 | 37.7   | 36.9 | 33.5 | 33.8 | 64.2 | 34.1 | 37.6   | 35.3 | 33.3 | 34.6 |      |      |
